# Supplementary material
Source: PubMed Central journal article supplement (PMC9444931)
Supplement: NIHMS1811587-supplement-1.pdf [file NIHMS1811587-supplement-1.pdf]

Sociocultural Factors, Access to Healthcare, and Lifestyle: Multifactorial Indicators in Association with Colorectal Cancer Risk.

| Supplemental Table 1. Frequency distribution of baseline characteristics stratified by race, among non-Hispanic white and non-Hispanic Black Southern Community Cohort Study participants, 2002-2009. |                                              |                                 |
|-------------------------------------------------------------------------------------------------------------------------------------------------------------------------------------------------------|----------------------------------------------|---------------------------------|
| Baseline Characteristic (%)                                                                                                                                                                           | Non-Hispanic white participants<br>(N=20903) | Black participants<br>(N=50687) |
| Male sex                                                                                                                                                                                              | 39.5                                         | 41.9                            |
| Socioeconomic status.                                                                                                                                                                                 |                                              |                                 |
| Household income, <\$15,000                                                                                                                                                                           | 46.1                                         | 59.8                            |
| Education                                                                                                                                                                                             |                                              |                                 |
| <High school                                                                                                                                                                                          | 23.5                                         | 31.2                            |
| High school                                                                                                                                                                                           | 32.1                                         | 34.3                            |
| >High school                                                                                                                                                                                          | 44.4                                         | 34.5                            |
| Neighborhood Deprivation Index, most deprived quintile <sup>a</sup>                                                                                                                                   | 15.8                                         | 60.3                            |
| Access to, and Use of Healthcare.                                                                                                                                                                     |                                              |                                 |
| Insurance status, insured                                                                                                                                                                             | 62.7                                         | 58.4                            |
| Colorectal cancer screening, ever                                                                                                                                                                     | 37.6                                         | 26.3                            |
| Health behaviors and Lifestyle factors.                                                                                                                                                               |                                              |                                 |
| Body mass index at baseline (kg/m <sup>2</sup> )                                                                                                                                                      |                                              |                                 |
| <18.5                                                                                                                                                                                                 | 1.3                                          | 1.1                             |
| 18.5-24.9                                                                                                                                                                                             | 25.6                                         | 23.3                            |
| ≥25.0                                                                                                                                                                                                 | 73.1                                         | 75.6                            |
| Physical activity guideline, meets guideline <sup>b</sup>                                                                                                                                             | 19.9                                         | 19.3                            |
| Diet quality score (number of recommendations met) <sup>c</sup>                                                                                                                                       |                                              |                                 |
| 2-3                                                                                                                                                                                                   | 10.2                                         | 12.5                            |
| 1                                                                                                                                                                                                     | 52.6                                         | 54.1                            |
| 0                                                                                                                                                                                                     | 37.2                                         | 33.4                            |
| Alcohol consumption <sup>d</sup>                                                                                                                                                                      |                                              |                                 |
| None                                                                                                                                                                                                  | 49.6                                         | 44.9                            |
| Moderate                                                                                                                                                                                              | 37.6                                         | 35.0                            |
| Heavy                                                                                                                                                                                                 | 12.8                                         | 20.1                            |
| Smoking status                                                                                                                                                                                        |                                              |                                 |
| Never                                                                                                                                                                                                 | 33.6                                         | 37.1                            |
| Former                                                                                                                                                                                                | 28.3                                         | 20.0                            |
| Current                                                                                                                                                                                               | 38.1                                         | 42.9                            |

<sup>a</sup> Comparison groups for neighborhood deprivation index were created by dividing participants into quintiles based on the distribution of neighborhood deprivation index value of all the census tracts in the 12 states that encompass the SCCS recruitment area. Q1 includes data from participants in the least deprived quartile of the neighborhood deprivation index.

<sup>b</sup> Participants met aerobic physical activity recommendations via sports and exercise if they reported  $\geq 150$  min/week of moderate activity,  $\geq 75$  min/week of vigorous activity or  $\geq 150$  min/week of moderate and vigorous activity combined. Participants who did not meet the physical activity guideline were classified into two groups of “somewhat active” and “inactive” based on whether they were above or below the median for total activity (in MET-hrs).

<sup>c</sup> Diet quality score created by summing number of nutrition-related ACS sub-guidelines met (0–3) related to consumption of grains, red and processed meats, and fruits and vegetables.

<sup>d</sup> Moderate alcohol consumption is defined as  $0 < \text{drinks/day} \leq 1$  drink/day for women and as  $0 < \text{drinks/day}$
