# Supplementary material
Source: PubMed Central journal article supplement (PMC9444931)
Supplement: NIHMS1811587-supplement-3.pdf [file NIHMS1811587-supplement-3.pdf]

Sociocultural Factors, Access to Healthcare, and Lifestyle: Multifactorial Indicators in Association with Colorectal Cancer Risk.

| Supplemental Table 3. The associations between components of the Diet Quality Score based on the ACS Guidelines on Nutrition and Physical Activity for Cancer Prevention <sup>a</sup> with colorectal cancer incidence.                                                                        |                       |       |                         |  |                    |       |                         |
|------------------------------------------------------------------------------------------------------------------------------------------------------------------------------------------------------------------------------------------------------------------------------------------------|-----------------------|-------|-------------------------|--|--------------------|-------|-------------------------|
| Guidelines                                                                                                                                                                                                                                                                                     | Total Analytic Cohort |       |                         |  | Black participants |       |                         |
|                                                                                                                                                                                                                                                                                                | Cohort                | Cases | HR (95%CI) <sup>b</sup> |  | Cohort             | Cases | HR (95%CI) <sup>b</sup> |
| A healthy eating pattern includes:                                                                                                                                                                                                                                                             |                       |       |                         |  |                    |       |                         |
| Consuming at least 4 cups of vegetables and fruit per day                                                                                                                                                                                                                                      |                       |       |                         |  |                    |       |                         |
| Meets recommendation                                                                                                                                                                                                                                                                           | 22629                 | 215   | 1 (ref.)                |  | 16580              | 172   | 1 (ref.)                |
| Does not meet recommendation                                                                                                                                                                                                                                                                   | 47404                 | 476   | 1.04 (0.88 to 1.24)     |  | 30410              | 336   | 1.00 (0.83 to 1.22)     |
| Choose at least ½ your grains as whole grains as opposed to refined grain products                                                                                                                                                                                                             |                       |       |                         |  |                    |       |                         |
| Meets recommendation                                                                                                                                                                                                                                                                           | 1479                  | 21    | 1 (ref.)                |  | 46289              | 496   | 1 (ref.)                |
| Does not meet recommendation                                                                                                                                                                                                                                                                   | 68554                 | 670   | 0.80 (0.52 to 1.25)     |  | 701                | 12    | 0.84 (0.47 to 1.51)     |
| A healthy eating pattern limits or does not include:                                                                                                                                                                                                                                           |                       |       |                         |  |                    |       |                         |
| Limit consumption of processed meat and red meat                                                                                                                                                                                                                                               |                       |       |                         |  |                    |       |                         |
| Least meat intake                                                                                                                                                                                                                                                                              | 17369                 | 215   | 1 (ref.)                |  | 11820              | 174   | 1 (ref.)                |
| Quartile 2                                                                                                                                                                                                                                                                                     | 17316                 | 163   | 0.84 (0.69 to 1.04)     |  | 11378              | 115   | 0.76 (0.60 to 0.96)     |
| Quartile 3                                                                                                                                                                                                                                                                                     | 17313                 | 159   | 0.86 (0.70 to 1.06)     |  | 11346              | 110   | 0.77 (0.60 to 0.98)     |
| Most meat intake                                                                                                                                                                                                                                                                               | 17301                 | 148   | 0.85 (0.68 to 1.07)     |  | 12078              | 105   | 0.74 (0.57 to 0.97)     |
| Abbreviations: ACS, American Cancer Society; HR, hazard ratio; CI, confidence interval; Ref., reference.                                                                                                                                                                                       |                       |       |                         |  |                    |       |                         |
| <sup>a</sup> American Cancer Society recommendations found at: <a href="http://www.cancer.org">www.cancer.org</a>                                                                                                                                                                              |                       |       |                         |  |                    |       |                         |
| <sup>b</sup> Adjusted for sex, race, enrollment source, household income, education, family history of colorectal cancer, insurance coverage, neighborhood deprivation, colorectal cancer screening participation, BMI, physical activity, sedentary time, alcohol intake, and smoking status. |                       |       |                         |  |                    |       |                         |
