# Supplementary material
Source: PubMed Central journal article supplement (PMC9444931)
Supplement: NIHMS1811587-supplement-4.pdf [file NIHMS1811587-supplement-4.pdf]

Sociocultural Factors, Access to Healthcare, and Lifestyle: Multifactorial Indicators in Association with Colorectal Cancer Risk.

Supplemental Table 4. The associations between a healthy lifestyle score after adjustment for sociocultural factors and access to care among Black participants.

|                                       |        |       | Model 1                 | Model 2 =<br>Model 1 + SES variables | Model 3 =<br>Model 2 + access to care |
|---------------------------------------|--------|-------|-------------------------|--------------------------------------|---------------------------------------|
| Healthy Lifestyle Score including BMI | Cohort | Cases | HR (95%CI) <sup>a</sup> | HR (95%CI) <sup>b</sup>              | HR (95%CI) <sup>c</sup>               |
| 0-1                                   | 10150  | 102   | 1 (ref.)                | 1 (ref.)                             | 1 (ref.)                              |
| 2                                     | 19292  | 241   | 1.16 (0.92 to 1.46)     | 1.17 (0.92 to 1.47)                  | 1.18 (0.94 to 1.50)                   |
| 3-5                                   | 20726  | 206   | 0.88 (0.69 to 1.13)     | 0.89 (0.70 to 1.14)                  | 0.91 (0.71 to 1.16)                   |

Abbreviations: CI, confidence interval; HR, hazard ratio; Ref., reference; SES, socioeconomic status.

<sup>a</sup> Adjusted for sex, enrollment source, and family history of colorectal cancer.

<sup>b</sup> Additionally adjusted for household income, education, and neighborhood deprivation.

<sup>c</sup> Additionally adjusted for colorectal cancer screening participation, and insurance coverage.

Healthy lifestyle score is a composite variable including BMI, smoking status, alcohol, physical activity, and the ACS diet score.
