# Supplementary material
Source: PubMed Central journal article supplement (PMC9444931)
Supplement: NIHMS1811587-supplement-5.pdf [file NIHMS1811587-supplement-5.pdf]

Sociocultural Factors, Access to Healthcare, and Lifestyle: Multifactorial Indicators in Association with Colorectal Cancer Risk.

| Supplemental Table 5. The associations between variables for race, education, access and use of healthcare and adherence to a healthy lifestyle with CRC risk, stratified by anatomic site. |        |                   |                         |              |                         |               |                         |
|---------------------------------------------------------------------------------------------------------------------------------------------------------------------------------------------|--------|-------------------|-------------------------|--------------|-------------------------|---------------|-------------------------|
| Baseline Characteristic                                                                                                                                                                     |        | Colorectal cancer |                         | Colon cancer |                         | Rectal cancer |                         |
| CRC Screening                                                                                                                                                                               | Cohort | Cases             | HR (95%CI) <sup>a</sup> | Cases        | HR (95%CI) <sup>a</sup> | Cases         | HR (95%CI) <sup>a</sup> |
| Never                                                                                                                                                                                       | 50380  | 532               | 1 (ref.)                | 398          | 1 (ref.)                | 102           | 1 (ref.)                |
| Ever                                                                                                                                                                                        | 21210  | 185               | 0.67 (0.56 to 0.79)     | 139          | 0.65 (0.53 to 0.80)     | 23            | 0.50 (0.31 to 0.80)     |
| <b>Race</b>                                                                                                                                                                                 |        |                   |                         |              |                         |               |                         |
| Black                                                                                                                                                                                       | 50687  | 549               | 1 (ref.)                | 409          | 1 (ref.)                | 99            | 1 (ref.)                |
| White                                                                                                                                                                                       | 20903  | 168               | 0.77 (0.64 to 0.91)     | 128          | 0.78 (0.64 to 0.96)     | 26            | 0.67 (0.43 to 1.05)     |
| <b>Education</b>                                                                                                                                                                            |        |                   |                         |              |                         |               |                         |
| < High school                                                                                                                                                                               | 44822  | 494               | 1 (ref.)                | 363          | 1 (ref.)                | 86            | 1 (ref.)                |
| ≥ High School                                                                                                                                                                               | 26768  | 223               | 0.81 (0.69 to 0.96)     | 174          | 0.86 (0.71 to 1.04)     | 39            | 0.81 (0.54 to 1.20)     |
| <b>Insurance Status</b>                                                                                                                                                                     |        |                   |                         |              |                         |               |                         |
| Uninsured                                                                                                                                                                                   | 28890  | 290               | 1 (ref.)                | 221          | 1 (ref.)                | 56            | 1 (ref.)                |
| Insured                                                                                                                                                                                     | 42700  | 427               | 0.88 (0.75 to 1.03)     | 316          | 0.83 (0.69 to 0.99)     | 69            | 0.84 (0.58 to 1.23)     |
| <b>Healthy Lifestyle Score</b>                                                                                                                                                              |        |                   |                         |              |                         |               |                         |
| 0-1                                                                                                                                                                                         | 20085  | 192               | 1 (ref.)                | 131          | 1 (ref.)                | 39            | 1 (ref.)                |
| 2                                                                                                                                                                                           | 28780  | 310               | 1.01 (0.84 to 1.21)     | 235          | 1.11 (0.89 to 1.38)     | 54            | 0.96 (0.63 to 1.45)     |
| 3-5                                                                                                                                                                                         | 22725  | 215               | 0.85 (0.70 to 1.04)     | 171          | 0.98 (0.77 to 1.23)     | 32            | 0.71 (0.44 to 1.14)     |
| Abbreviations: CI, confidence interval; HR, hazard ratio; Ref., reference; SES, socioeconomic status.                                                                                       |        |                   |                         |              |                         |               |                         |
| <sup>a</sup> Adjusted for enrollment source, and the variables included in the table. Analysis is restricted to participants self-identified as non-Hispanic white or black.                |        |                   |                         |              |                         |               |                         |
| Healthy lifestyle score is a composite variable including smoking status, alcohol, physical activity, and the ACS diet score.                                                               |        |                   |                         |              |                         |               |                         |
