# Supplementary material
Source: PubMed Central journal article supplement (PMC9444931)
Supplement: NIHMS1811587-supplement-6.pdf [file NIHMS1811587-supplement-6.pdf]

Sociocultural Factors, Access to Healthcare, and Lifestyle: Multifactorial Indicators in Association with Colorectal Cancer Risk.

| Supplemental Table 6. The associations between healthy lifestyle score, sociocultural factors, and access to care with colorectal cancer risk by colorectal cancer screening at baseline interview, among participants ≥ age 50 at enrollment. |                                           |                |                         |                   |                |                         |
|------------------------------------------------------------------------------------------------------------------------------------------------------------------------------------------------------------------------------------------------|-------------------------------------------|----------------|-------------------------|-------------------|----------------|-------------------------|
| Baseline Characteristic                                                                                                                                                                                                                        | Colorectal cancer screening participation |                |                         |                   |                |                         |
|                                                                                                                                                                                                                                                | Never                                     |                |                         | Ever              |                |                         |
|                                                                                                                                                                                                                                                | Cohort<br>N=23749                         | Cases<br>N=368 | HR (95%CI) <sup>a</sup> | Cohort<br>N=16520 | Cases<br>N=154 | HR (95%CI) <sup>a</sup> |
| Healthy lifestyle score <sup>b</sup>                                                                                                                                                                                                           |                                           |                |                         |                   |                |                         |
| 0-1                                                                                                                                                                                                                                            | 6472                                      | 92             | 1 (ref.)                | 3216              | 25             | 1 (ref.)                |
| 2                                                                                                                                                                                                                                              | 9855                                      | 166            | 1.12 (0.86 to 1.46)     | 7069              | 74             | 1.25 (0.79 to 1.97)     |
| 3-5                                                                                                                                                                                                                                            | 7422                                      | 110            | 0.92 (0.69 to 1.24)     | 6389              | 55             | 1.06 (0.65 to 1.74)     |
| Body mass index (kg/m <sup>2</sup> )                                                                                                                                                                                                           |                                           |                |                         |                   |                |                         |
| <18.5                                                                                                                                                                                                                                          | 308                                       | 7              | 1.64 (0.76 to 3.55)     | 123               | 0              | --                      |
| 18.5-24.9                                                                                                                                                                                                                                      | 5628                                      | 85             | 1 (ref.)                | 3196              | 27             | 1 (ref.)                |
| 25.0-29.9                                                                                                                                                                                                                                      | 7374                                      | 130            | 1.10 (0.83 to 1.45)     | 5371              | 42             | 0.85 (0.52 to 1.37)     |
| ≥30.0                                                                                                                                                                                                                                          | 10439                                     | 146            | 0.87 (0.66 to 1.16)     | 7984              | 85             | 1.30 (0.83 to 2.02)     |
| Race                                                                                                                                                                                                                                           |                                           |                |                         |                   |                |                         |
| Black                                                                                                                                                                                                                                          | 16053                                     | 275            | 1 (ref.)                | 9676              | 101            | 1 (ref.)                |
| White                                                                                                                                                                                                                                          | 6505                                      | 78             | 0.71 (0.53 to 0.93)     | 6110              | 49             | 0.84 (0.56 to 1.24)     |
| Other <sup>c</sup>                                                                                                                                                                                                                             | 1191                                      | 15             | 0.75 (0.44 to 1.28)     | 888               | 4              | 0.54 (0.20 to 1.49)     |
| Sex                                                                                                                                                                                                                                            |                                           |                |                         |                   |                |                         |
| Female                                                                                                                                                                                                                                         | 13864                                     | 212            | 1 (ref.)                | 10541             | 86             | 1 (ref.)                |
| Male                                                                                                                                                                                                                                           | 9885                                      | 156            | 1.10 (0.88 to 1.37)     | 6133              | 68             | 1.67 (1.19 to 2.34)     |
| Household income, \$                                                                                                                                                                                                                           |                                           |                |                         |                   |                |                         |
| <15,000                                                                                                                                                                                                                                        | 14101                                     | 222            | 1 (ref.)                | 7672              | 79             | 1 (ref.)                |
| 15,000-24,999                                                                                                                                                                                                                                  | 5193                                      | 79             | 1.00 (0.77 to 1.30)     | 3329              | 26             | 0.78 (0.50 to 1.23)     |
| ≥25,000                                                                                                                                                                                                                                        | 4455                                      | 67             | 1.06 (0.77 to 1.47)     | 5673              | 49             | 1.09 (0.69 to 1.71)     |
| Education                                                                                                                                                                                                                                      |                                           |                |                         |                   |                |                         |
| <High school                                                                                                                                                                                                                                   | 8024                                      | 135            | 1.03 (0.80 to 1.34)     | 4310              | 55             | 1.07 (0.71 to 1.61)     |
| High school                                                                                                                                                                                                                                    | 7419                                      | 111            | 1 (ref.)                | 4548              | 47             | 1 (ref.)                |
| >High school                                                                                                                                                                                                                                   | 8306                                      | 122            | 1.01 (0.76 to 1.32)     | 7816              | 52             | 0.62 (0.41 to 0.95)     |
| Neighborhood Deprivation Index <sup>c</sup>                                                                                                                                                                                                    |                                           |                |                         |                   |                |                         |
| Least deprived quintile                                                                                                                                                                                                                        | 1521                                      | 23             | 1 (ref.)                | 1754              | 15             | 1 (ref.)                |
| Quintile 2                                                                                                                                                                                                                                     | 2754                                      | 42             | 1.04 (0.62 to 1.74)     | 2477              | 22             | 0.97 (0.50 to 1.89)     |
| Quintile 3                                                                                                                                                                                                                                     | 3158                                      | 37             | 0.76 (0.45 to 1.29)     | 2551              | 23             | 0.95 (0.49 to 1.85)     |
| Quintile 4                                                                                                                                                                                                                                     | 5204                                      | 86             | 1.00 (0.63 to 1.61)     | 3679              | 30             | 0.81 (0.42 to 1.55)     |
| Most deprived quintile                                                                                                                                                                                                                         | 11112                                     | 180            | 0.92 (0.58 to 1.46)     | 6213              | 64             | 0.94 (0.50 to 1.75)     |
| Insurance status                                                                                                                                                                                                                               |                                           |                |                         |                   |                |                         |
| Uninsured                                                                                                                                                                                                                                      | 9628                                      | 157            | 1 (ref.)                | 3373              | 28             | 1 (ref.)                |
| Insured                                                                                                                                                                                                                                        | 14121                                     | 211            | 0.81 (0.65 to 1.01)     | 13301             | 126            | 0.97 (0.63 to 1.51)     |

Abbreviations: CI, confidence interval; HR, hazard ratio; Ref., reference.

<sup>a</sup> Adjusted for the variables included in the table, enrollment source and family history of colorectal cancer.

<sup>b</sup> Healthy lifestyle score is a composite variable including smoking status, alcohol, physical activity, and the ACS diet score.

<sup>c</sup> Other includes all participants who self-identify their race as a race other than non-Hispanic black or non-Hispanic white.

Healthy lifestyle score is a composite variable including smoking status, alcohol, physical activity, and the ACS diet score.
